# Supplementary material for: Monocytes Count, NLR, MLR and PLR in Canine Inflammatory Bowel Disease
Source: MDPI journal article supplement (doi:10.3390/ani14060837), 2024-03-08

**Figure S1:** Receiver-operating characteristics (ROC) curve for the most relevant variables.

- A. ROC curve illustrating red blood cells (RBC) concentrations ( $10^6/\mu\text{L}$ ) that distinguish clinically healthy dogs from dogs with Inflammatory Bowel Disease (IBD).
- B. ROC curve illustrating hemoglobin (Hb) concentrations (g/dL) that distinguish clinically healthy dogs from dogs with IBD.
- C. ROC curve illustrating white blood cells (WBC) concentrations ( $10^3/\mu\text{L}$ ) that distinguish clinically healthy dogs from dogs with IBD.
- D. ROC curve illustrating neutrophils concentrations ( $10^3/\mu\text{L}$ ) that distinguish clinically healthy dogs from dogs with IBD.
- E. ROC curve illustrating monocytes concentrations ( $10^2/\mu\text{L}$ ) that distinguish clinically healthy dogs from dogs with IBD.
- F. ROC curve illustrating neutrophil-to-lymphocyte (NLR) ratio that distinguish clinically healthy dogs from dogs with IBD.
- G. ROC curve illustrating monocyte-to-lymphocyte (MLR) ratio that distinguish clinically healthy dogs from dogs with IBD.
- H. ROC curve illustrating platelet-to-lymphocyte (PLR) ratio that distinguish clinically healthy dogs from dogs with IBD.

A.

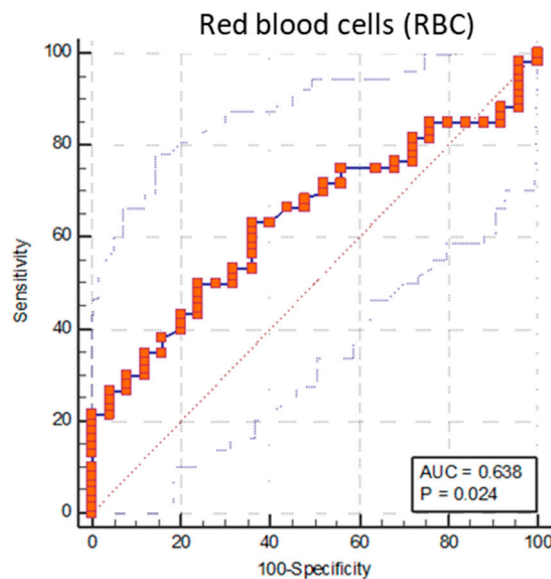

B.

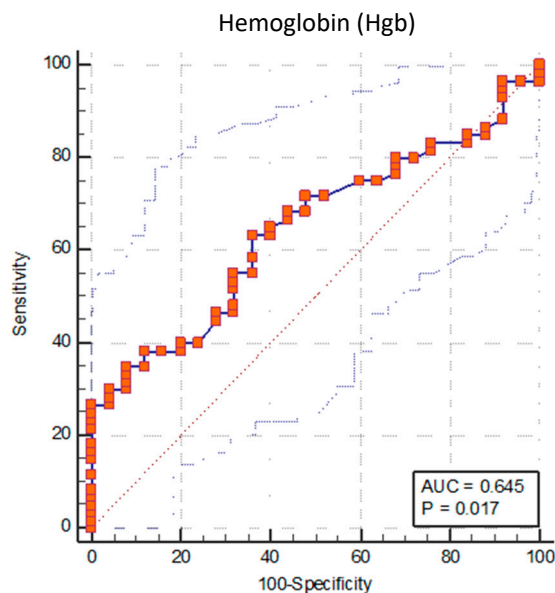

C.

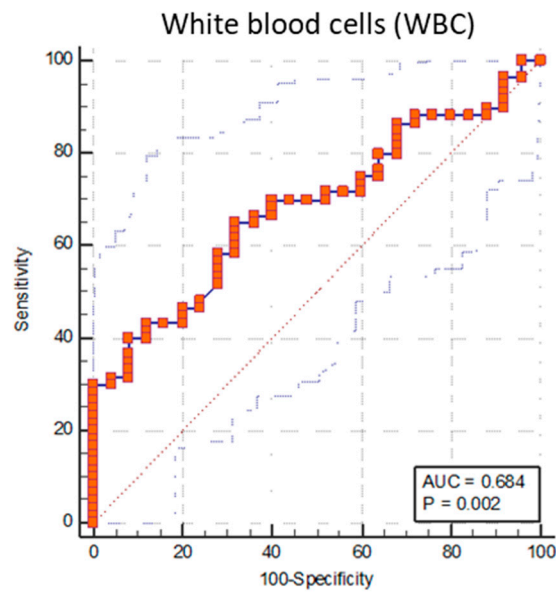

D.

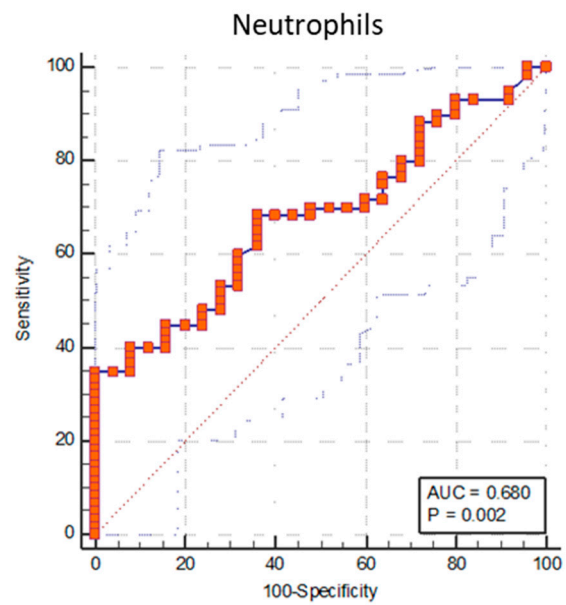

E.

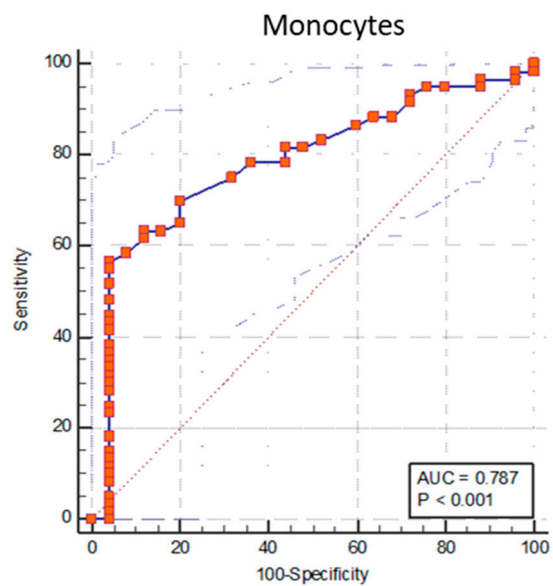

F.

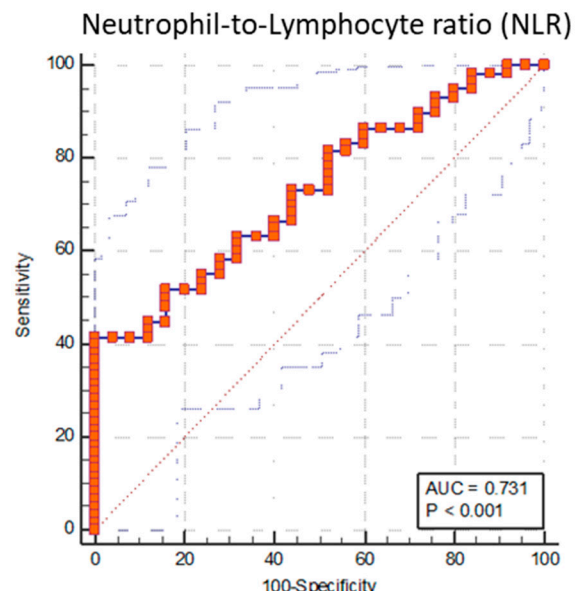

G.

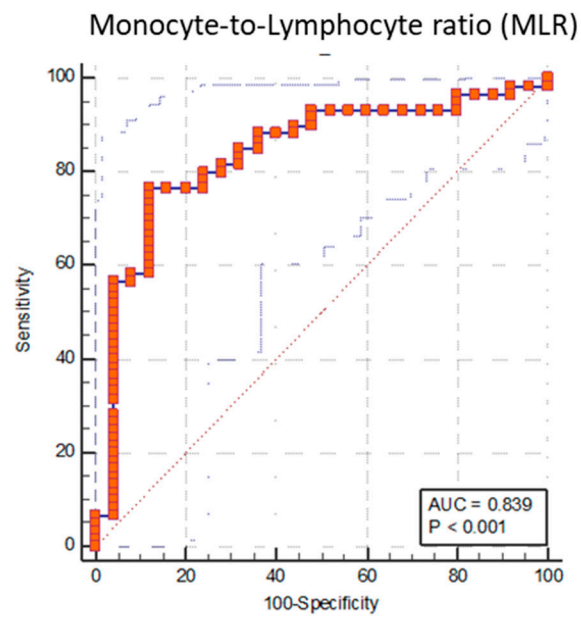

H.

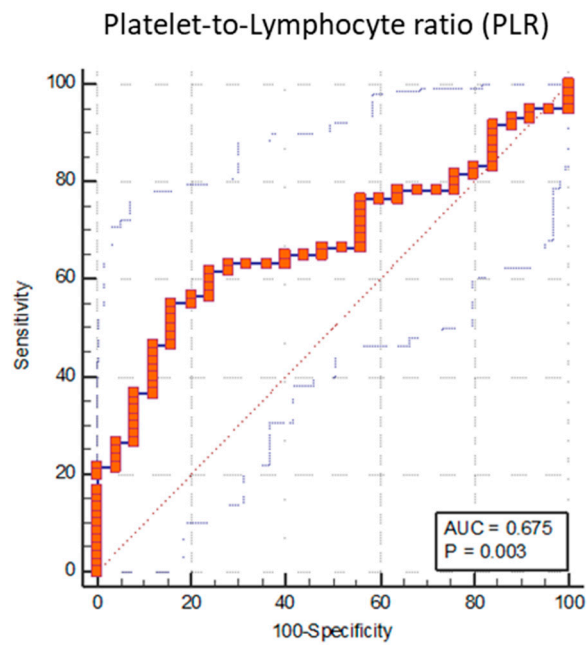

Supplement: s1 [file s1]
